# Supplementary material
Source: Springer Nature journal article supplement (https://www.springermedizin.de/resource/supplementary/13041_2013_204_MOESM3_ESM.pdf/25657734)
Supplement: MOESM3 [file 25657734]

| Category             | Region                      | Fragile X Mouse Phenotype                                               | Age                              | References                                                                                                                                           |
|----------------------|-----------------------------|-------------------------------------------------------------------------|----------------------------------|------------------------------------------------------------------------------------------------------------------------------------------------------|
| mGluR LTD            | hippocampus                 | enhanced                                                                | P25-30                           | Huber et al., <i>PNAS</i> , 2002; Hou et al., <i>Neuron</i> , 2006; Bhattacharya et al., <i>Neuron</i> , 2012; Michalon et al., <i>Neuron</i> , 2012 |
| mGluR LTD            | hippocampus                 | does not require new protein synthesis                                  | 4-12 wk                          | Nosyreva and Huber, <i>J Neurophys</i> , 2006; Hou, et al., <i>Neuron</i> , 2006; Zang et al., <i>PLoS Genetics</i> , 2009                           |
| mGluR LTD            | hippocampus                 | <b>[Fmr1 CGG premutation KI mouse]</b><br>enhanced and not PS-dependent | P35-42                           | Iliff et al., <i>Hum Mol Genet</i> , 2012                                                                                                            |
| mGluR LTD            | cerebellum                  | enhanced                                                                | 3-7 wk                           | Koekkoek et al., <i>Neuron</i> , 2005                                                                                                                |
| mAChR LTD            | hippocampus                 | enhanced and does not require new protein synthesis                     | 3-7 wk                           | Volk et al., <i>J Neurosci</i> , 2007                                                                                                                |
| LTP                  | hippocampus                 | NONE                                                                    | 20-26 wk; 8-10 wk;<br>3-12 month | Godfraind et al., <i>Am J Med Genet</i> , 1996; Li et al., <i>Mol Cell Neurosci</i> , 2002; Larson et al., <i>J Neurosci</i> , 2005                  |
| L-LTP                | hippocampus                 | NONE                                                                    | 5-7 wk; 2-4 month                | Paradee et al., <i>Neuroscience</i> , 1999; Zhang et al., <i>J Neurophys</i> , 2009                                                                  |
| LTP                  | hippocampus                 | deficient                                                               | 2 wk; 6-8 wk                     | Hu et al., <i>J Neurosci</i> , 2008; Shang et al., <i>J Neurochem</i> , 2009                                                                         |
| LTP                  | hippocampus                 | deficient with weak stimulus; normal with strong stimulus               | 2-3 month                        | Lauterborn et al., <i>J Neurosci</i> , 2007                                                                                                          |
| LTP                  | hippocampus                 | enhanced B-adrenergic-facilitated heterosynaptic LTP (PS-dependent)     | 3-4 month                        | Connor et al., <i>Learn Mem</i> , 2011                                                                                                               |
| LTP priming          | hippocampus                 | does not require new protein synthesis (mGluR-dependent)                | 6-10 wk                          | Auerbach and Bear, <i>J Neurophys</i> , 2010                                                                                                         |
| LTP                  | anterior cingulate ctx      | deficient                                                               | 6-8 wk                           | Zhao et al., <i>J Neurosci</i> , 2005; Xu et al., <i>PLoS One</i> , 2012                                                                             |
| LTP                  | anterior cingulate ctx      | impaired facilitation of LTP by 5-HT2AR agonist                         | 6-8 wk                           | Xu et al., <i>PLoS One</i> , 2012                                                                                                                    |
| LTP                  | somatosensory, temporal ctx | deficient                                                               | 8-10 wk; 3 month                 | Li et al., <i>Mol Cell Neurosci</i> , 2002; Hayashi et al., <i>PNAS</i> , 2007                                                                       |
| LTP                  | somatosensory ctx           | delayed window for plasticity                                           | P3-10                            | Harlow et al., <i>Neuron</i> , 2010                                                                                                                  |
| LTP                  | visual ctx                  | deficient (mGluR-dependent)                                             | P13-25                           | Wilson and Cox, <i>Neuron</i> , 2007                                                                                                                 |
| LTP                  | anterior piriform ctx       | deficient in aged mice; normal in 3-6 mo mice                           | 6-18 month                       | Larson et al., <i>J Neurosci</i> , 2005                                                                                                              |
| LTP                  | amygdala                    | impaired (mGluR-dependent)                                              | 6-8 wk; 3.5-6 mo                 | Zhao et al., <i>J Neurosci</i> , 2005; Suvrathan et al., <i>PNAS</i> , 2010                                                                          |
| STD-LTP              | somatosensory ctx           | deficient with weak stimulus                                            | P10-18                           | Desai et al., <i>J Neurophys</i> , 2006                                                                                                              |
| STD-LTP              | prefrontal ctx              | deficient with weak stimulus; normal with strong stimulus               | P14-23                           | Meredith et al., <i>Neuron</i> , 2007                                                                                                                |
| homeostasis          | hippocampus                 | deficient translation-dependent scaling                                 | P6-7 slice culture               | Soden and Chen, <i>J Neurosci</i> , 2010                                                                                                             |
| homeostasis          | hippocampus                 | normal transcription-dependent scaling                                  | P6-7 slice culture               | Soden and Chen, <i>J Neurosci</i> , 2010                                                                                                             |
| experience-dependent | visual ctx (in vivo)        | altered ocular dominance plasticity                                     | LTD                              | Dolen et al., <i>Neuron</i> , 2007                                                                                                                   |
| experience-dependent | somatosensory ctx           | deficient experience-dependent plasticity (induced by whisker trimming) | LTD                              | Bureau et al., <i>J Neurosci</i> , 2008                                                                                                              |
